# Supplementary material for: Understanding the active formation of a cathode–electrolyte interphase (CEI) layer with energy level band bending for lithium-ion batteries
Source: Royal Society of Chemistry journal article supplement (doi:10.1039/d2ta07565b), 2022-11-22
Supplement: d2ta07565b1.pdf [file d2ta07565b1.pdf]

## Supporting information

### **Understanding the active formation of a cathode–electrolyte interphase (CEI) layer with energy level band bending for lithium-ion batteries**

Taehoon Kim,<sup>\*,a,b</sup> Luis K. Ono,<sup>b</sup> and Yabing Qi<sup>\*,b</sup>

<sup>a</sup> Department of Safety Engineering, Incheon National University (INU), 119 Academy-ro, Yeonsu-gu, Incheon 22012, Republic of Korea.

<sup>b</sup> Energy Materials and Surface Sciences Unit (EMSSU), Okinawa Institute of Science and Technology Graduate University (OIST), 1919-1 Tancha, Onna-son, Okinawa 904-0495, Japan.

\*Corresponding authors: Taehoon Kim, E-Mail: [kths@inu.ac.kr](mailto:kths@inu.ac.kr); Yabing Qi, E-Mail: [Yabing.Qi@OIST.jp](mailto:Yabing.Qi@OIST.jp)

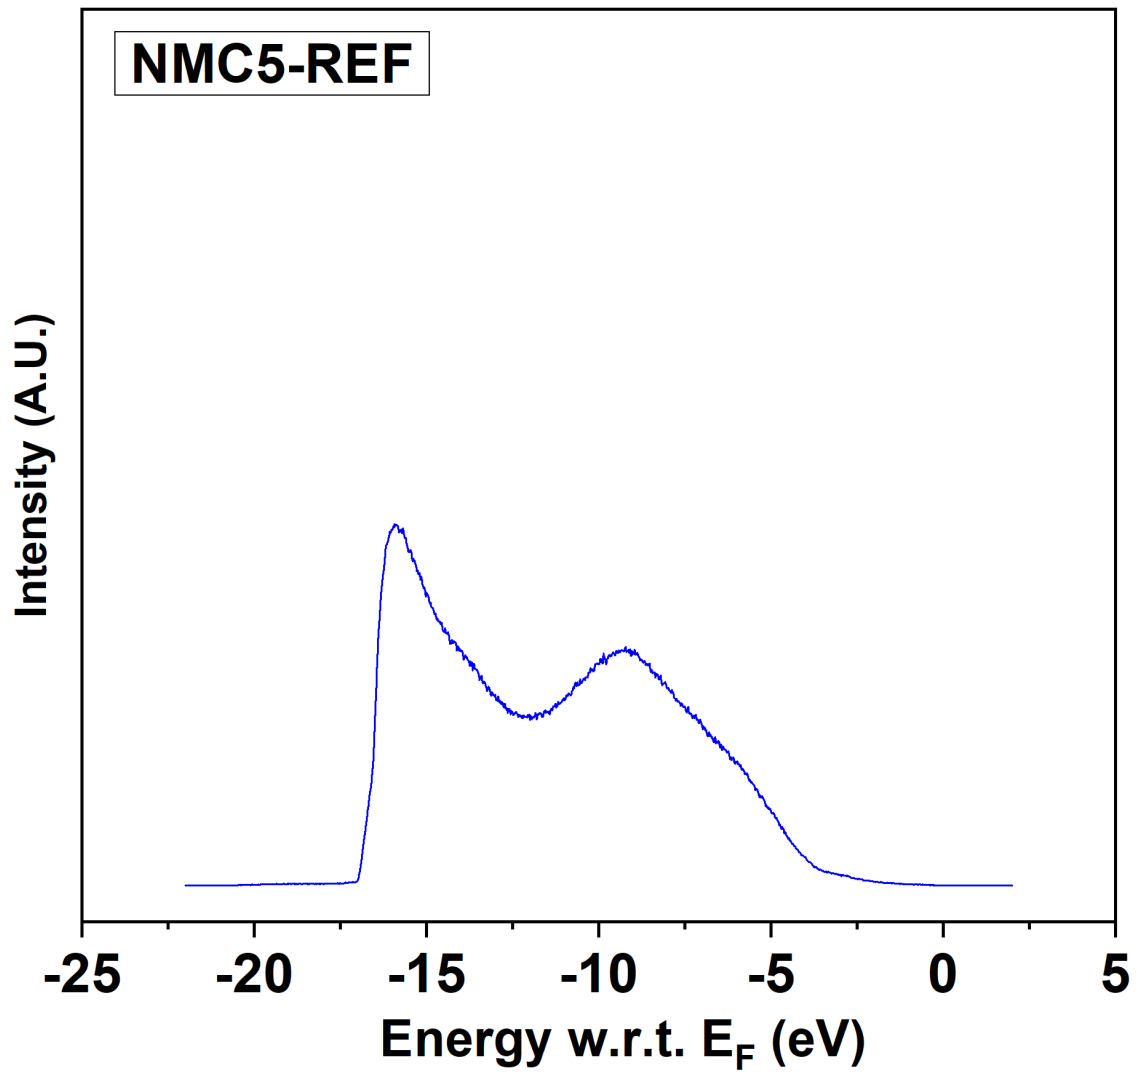

**Fig. S1.** Full spectrum obtained from the ultraviolet photoemission spectroscopy (UPS) measurements on  $\text{Li}(\text{Ni}_{0.5}\text{Mn}_{0.3}\text{Co}_{0.2})\text{O}_2$  at reference state (REF).

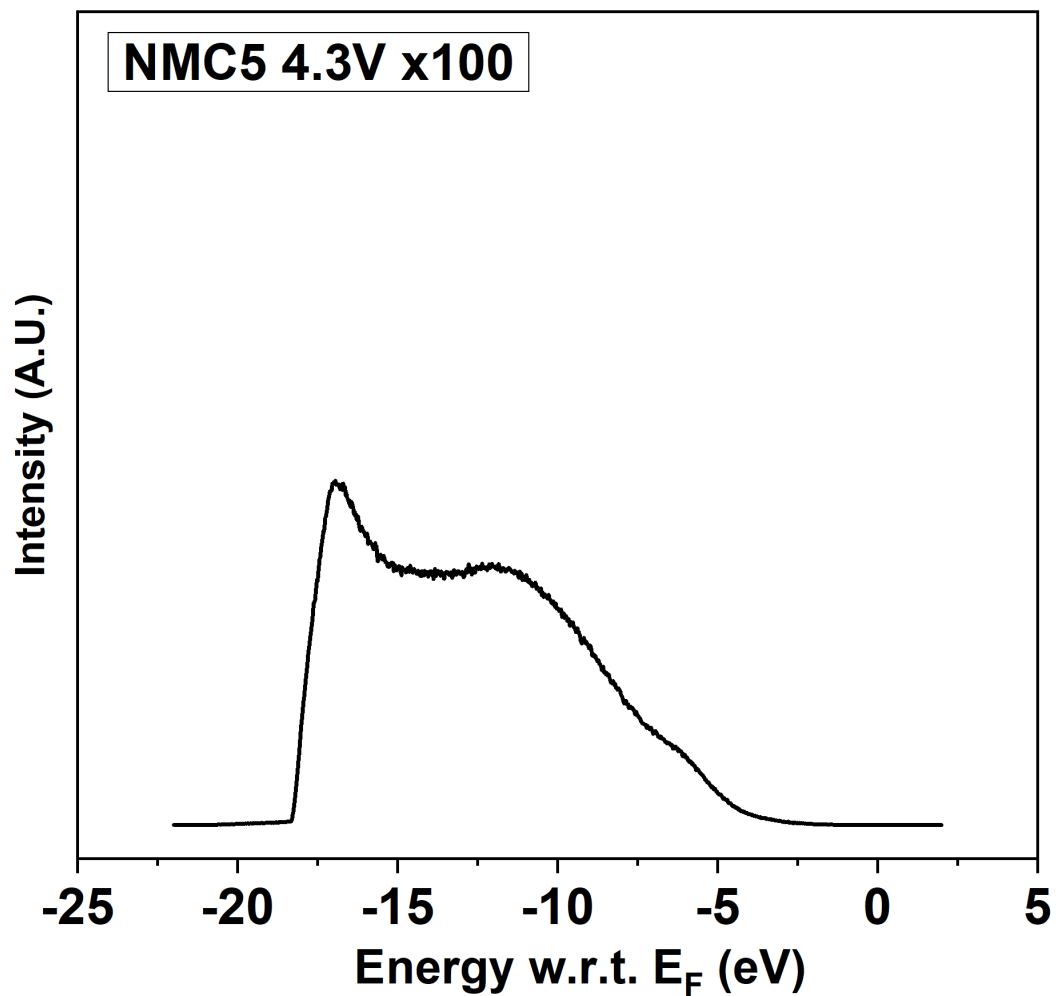

**Fig. S2.** Full spectrum obtained from the ultraviolet photoemission spectroscopy (UPS) measurements on  $\text{Li}(\text{Ni}_{0.5}\text{Mn}_{0.3}\text{Co}_{0.2})\text{O}_2$  after 100 cycles in the voltage range of 2.8 – 4.3 V with 0.4C current applied.

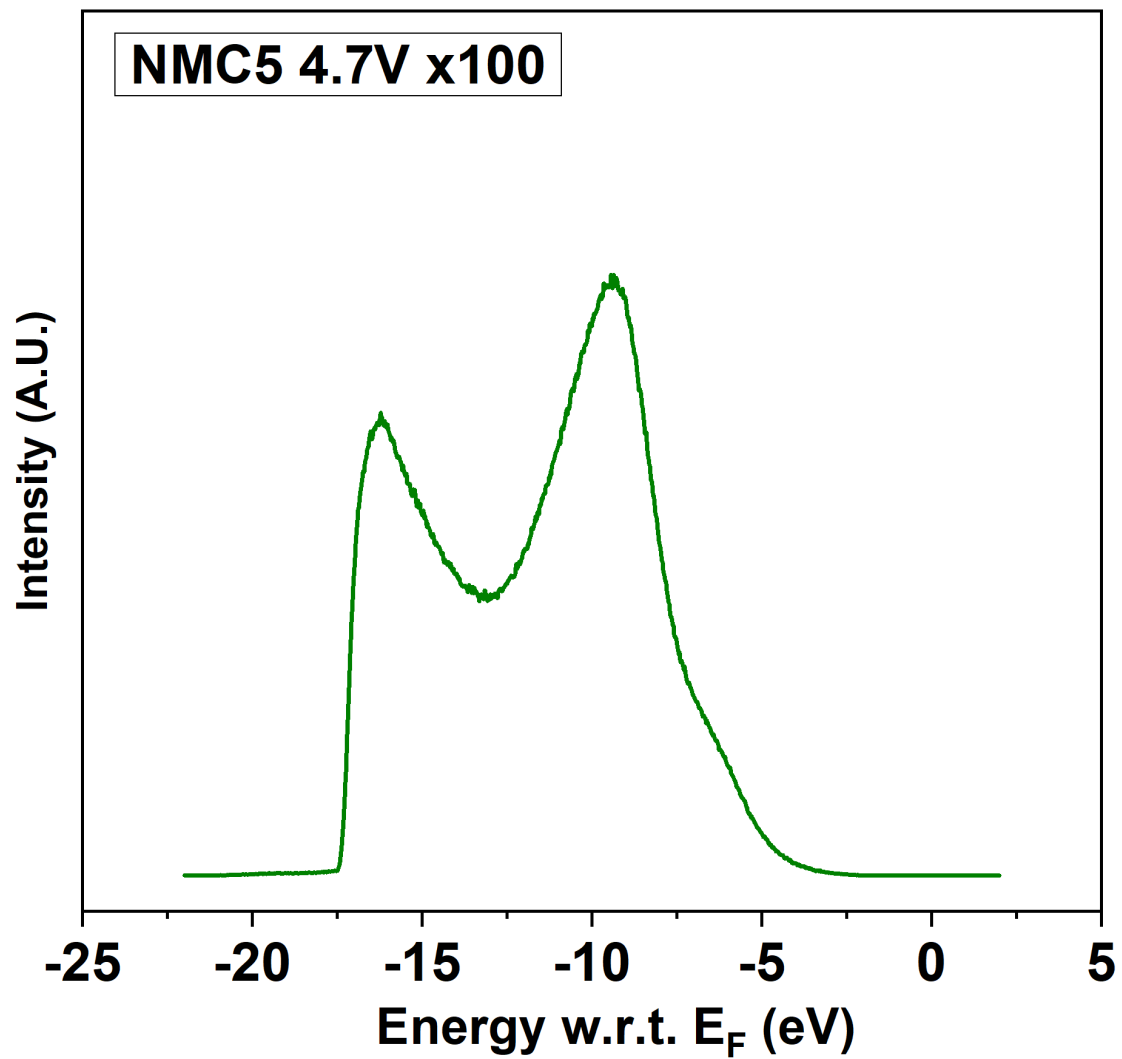

**Fig. S3.** Full spectrum obtained from the ultraviolet photoemission spectroscopy (UPS) measurements on  $\text{Li}(\text{Ni}_{0.5}\text{Mn}_{0.3}\text{Co}_{0.2})\text{O}_2$  after 100 cycles in the voltage range of 2.8 – 4.7 V with 0.4C current applied.

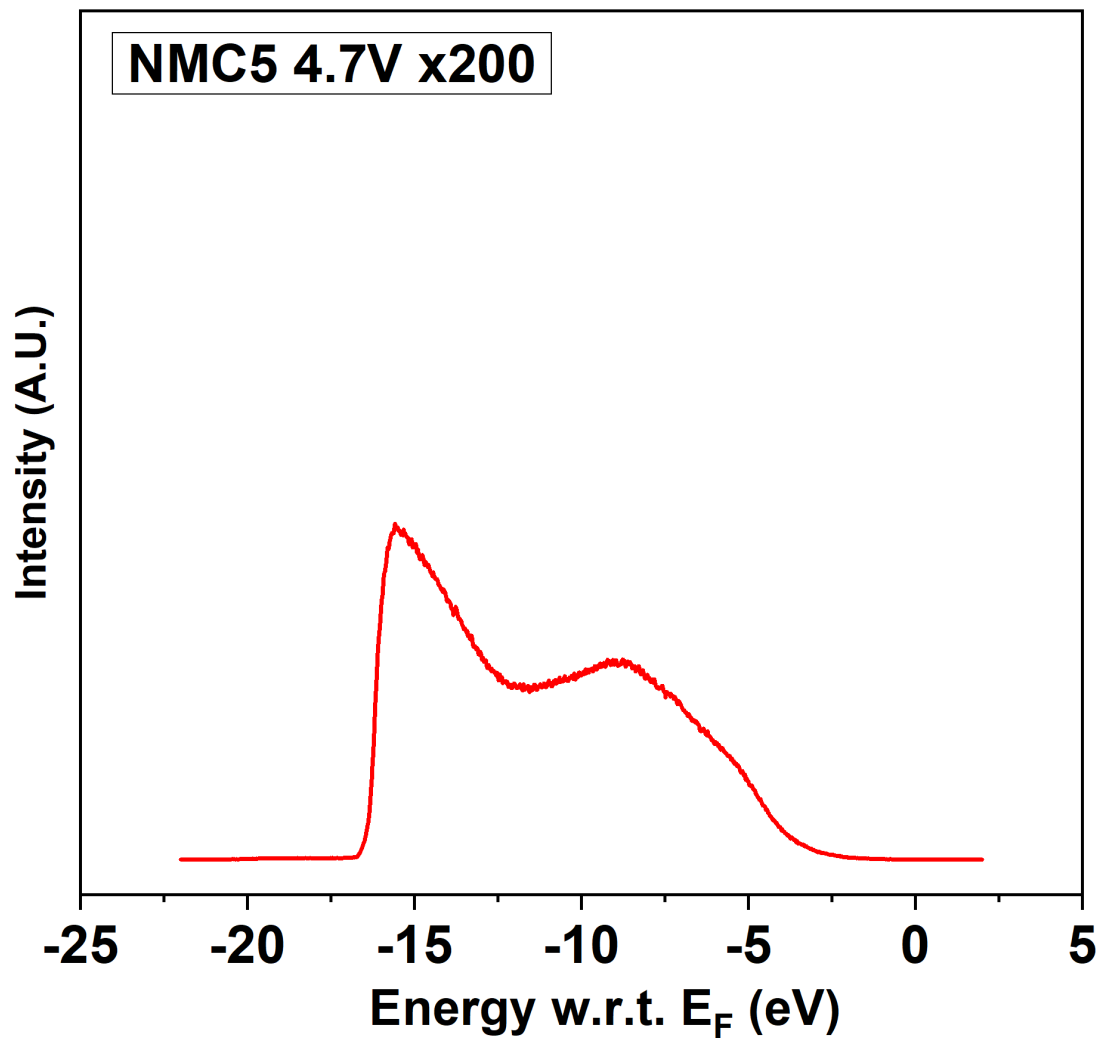

**Fig. S4.** Full spectrum obtained from the ultraviolet photoemission spectroscopy (UPS) measurements on  $\text{Li}(\text{Ni}_{0.5}\text{Mn}_{0.3}\text{Co}_{0.2})\text{O}_2$  after 200 cycles in the voltage range of 2.8 – 4.7 V with 0.4C current applied.

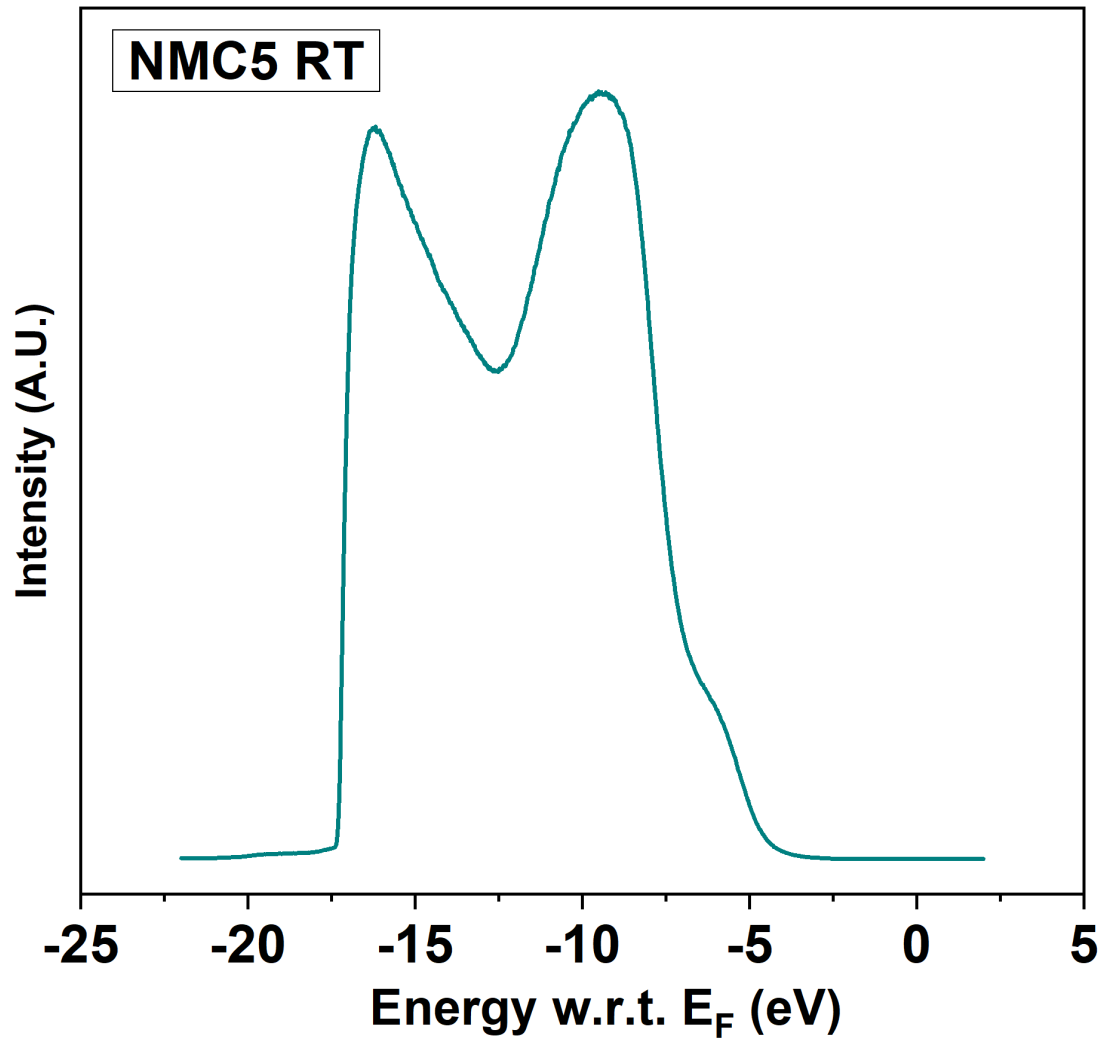

**Fig. S5.** Full spectrum obtained from the ultraviolet photoemission spectroscopy (UPS) measurements on  $\text{Li}(\text{Ni}_{0.5}\text{Mn}_{0.3}\text{Co}_{0.2})\text{O}_2$  after 40 cycles with dynamic current rates from 0.125 C to 0.25 C to 0.4 C and back to 0.125 C in the voltage range of 2.0 – 4.5 V.

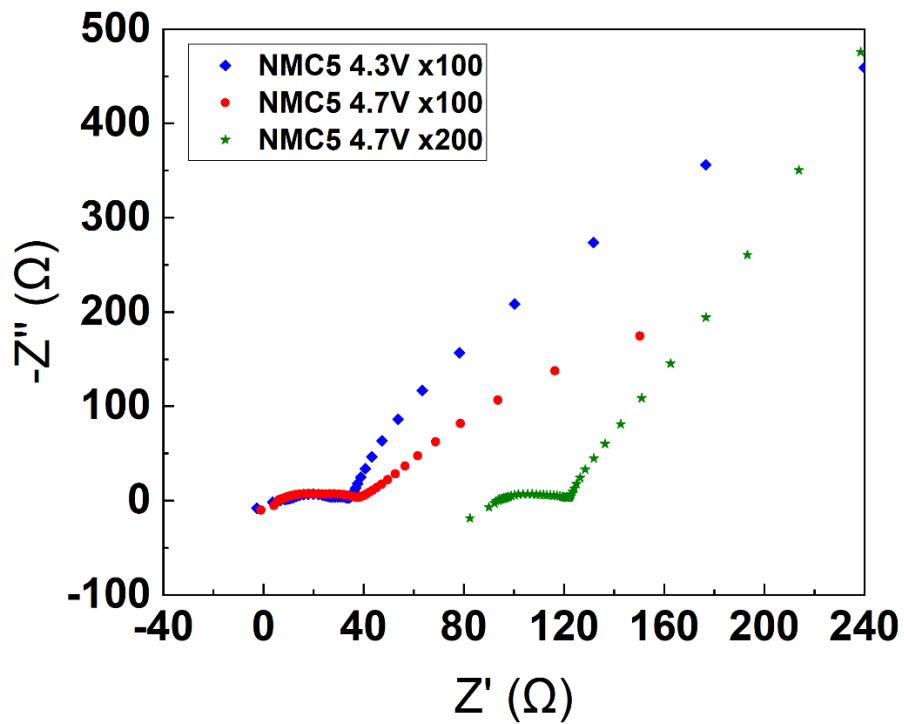

**Fig. S6.** EIS measurements (Nyquist plot) on  $\text{Li}(\text{Ni}_{0.5}\text{Mn}_{0.3}\text{Co}_{0.2})\text{O}_2$  (NMC5) after 100 cycles in the voltage range of 2.8 – 4.3 V (at 0.4C-rate), after 100 cycles in the voltage range of 2.8 – 4.7 V (at 0.4C-rate), and after 200 cycles in the voltage range of 2.8 – 4.7 V (at 0.4C-rate).

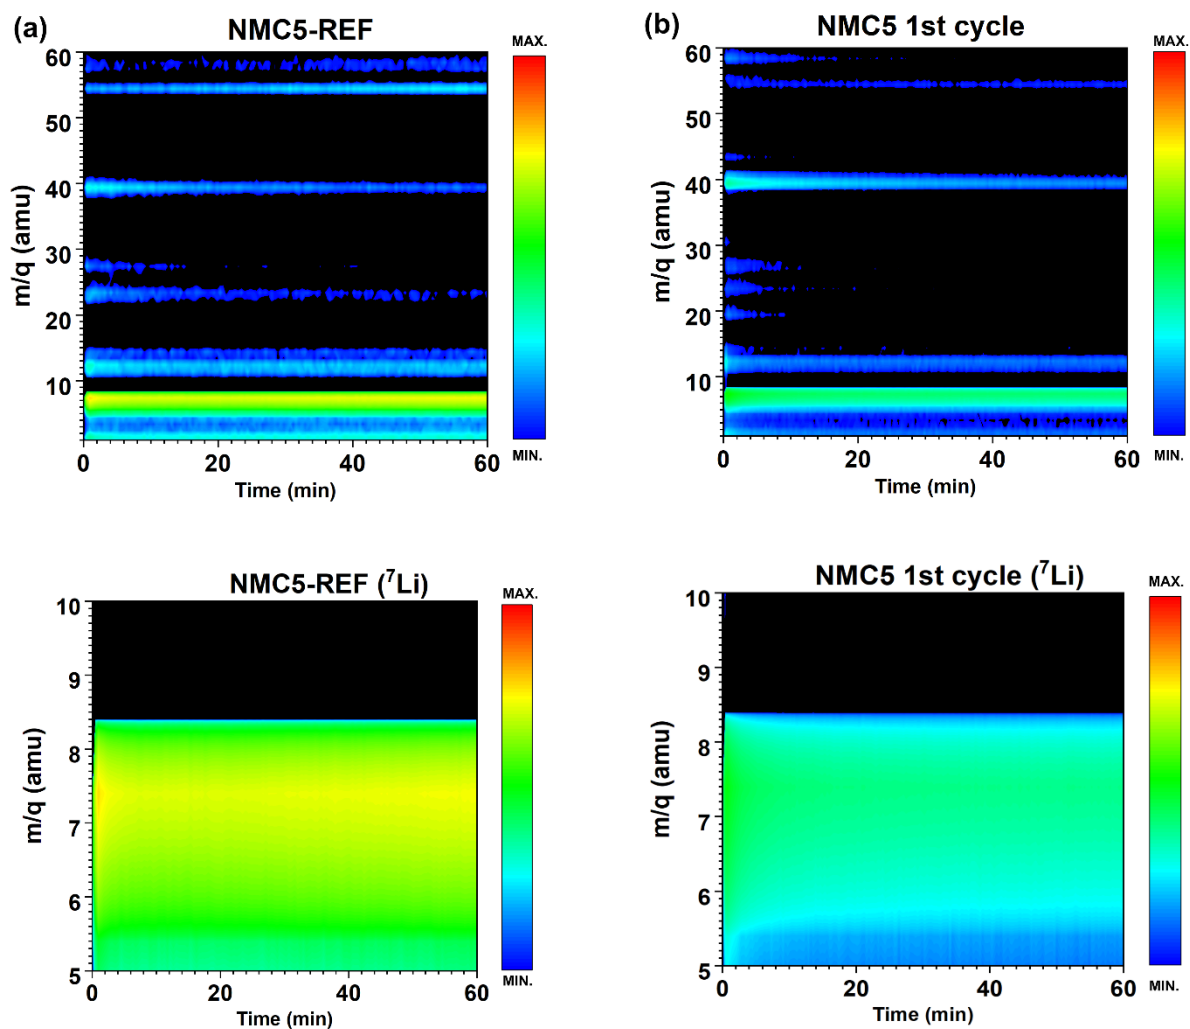

**Fig. S7.** Visualization of the cathode-electrolyte interphase (CEI) formation by SIMS positive-ion detection (PID) mode on (a) NMC5 (REF) at reference state, and (b)  $\text{Li}(\text{Ni}_{0.5}\text{Mn}_{0.3}\text{Co}_{0.2})\text{O}_2$  (NMC5) after 1<sup>st</sup> cycle in the voltage range of 2.8 – 4.7 V with 0.4 C current applied. Comparison of the  $^7\text{Li}$  distribution between NMC5-REF and NMC5 with initial cycle.



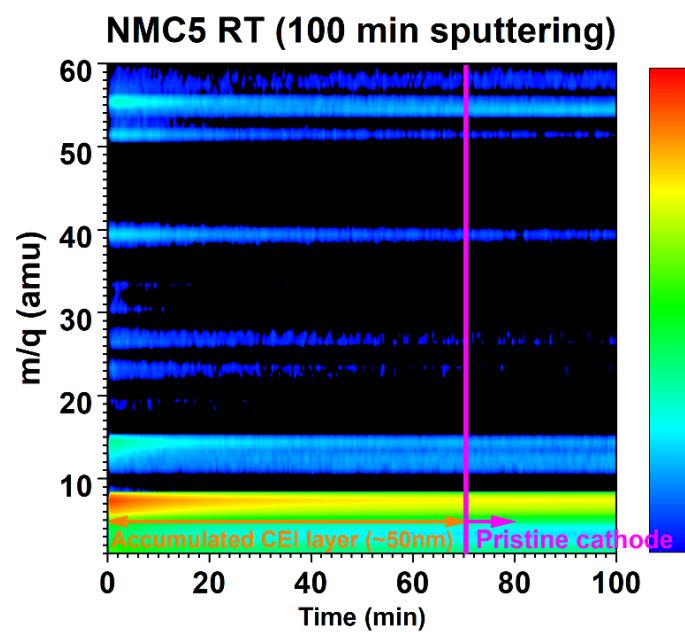

**Fig. S8.** Visualization of the accumulated CEI layer and the pristine part of the NMC5 RT cathode based on the SIMS positive-ion detection mode.
